# Supplementary material
Source: PubMed Central journal article supplement (PMC5762202)

**A**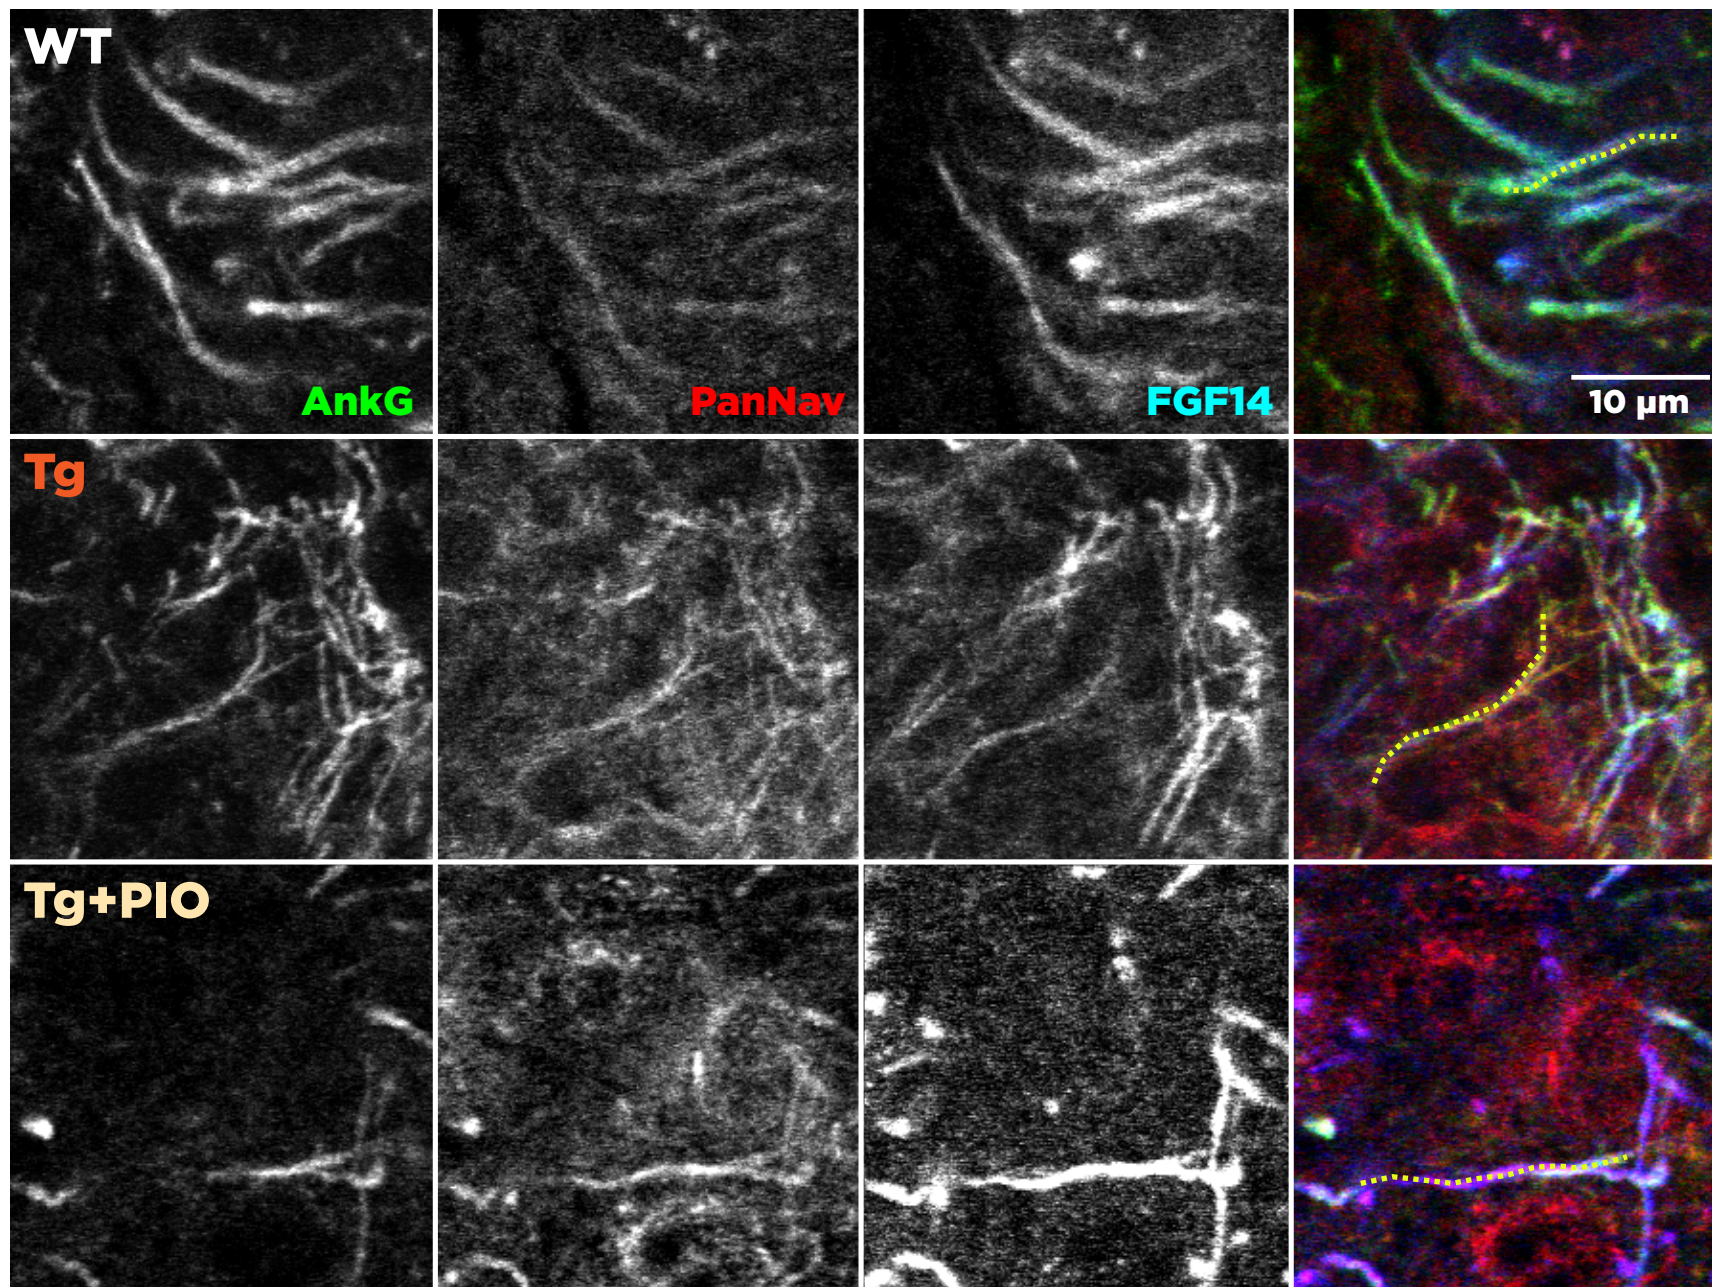**B**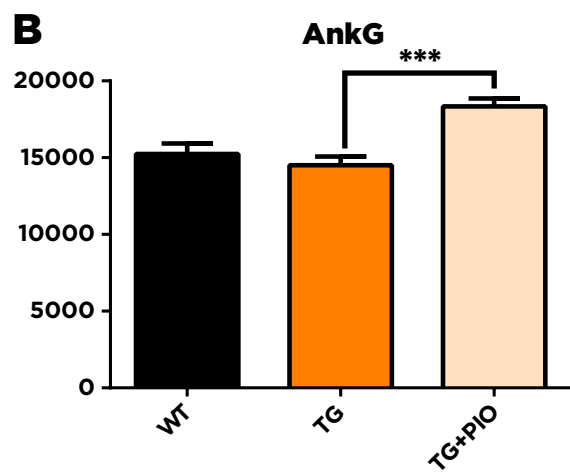**C**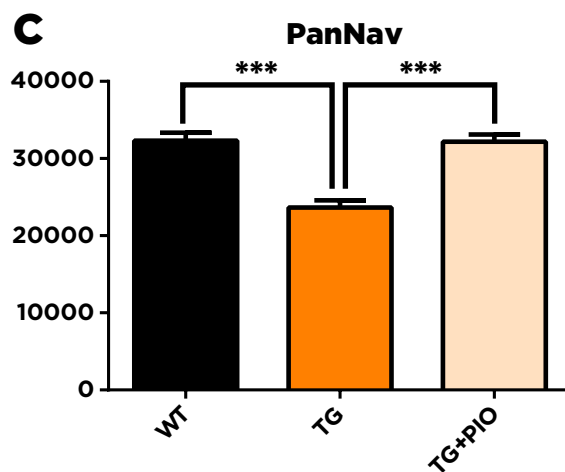**D**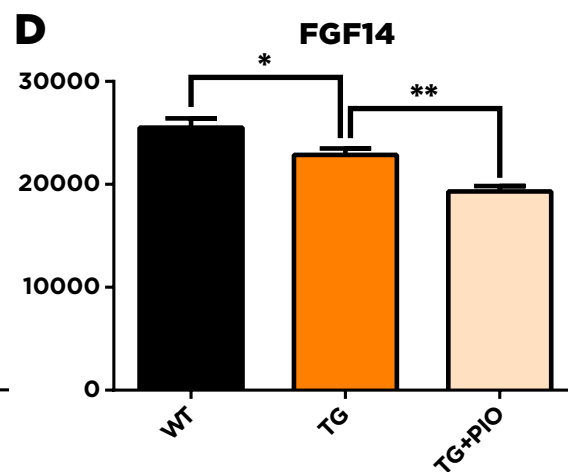**E**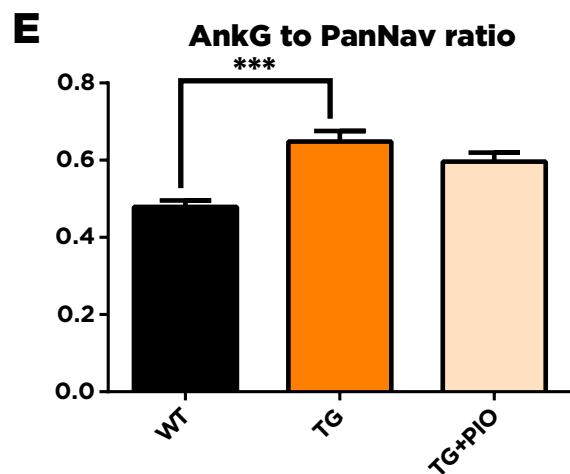**F**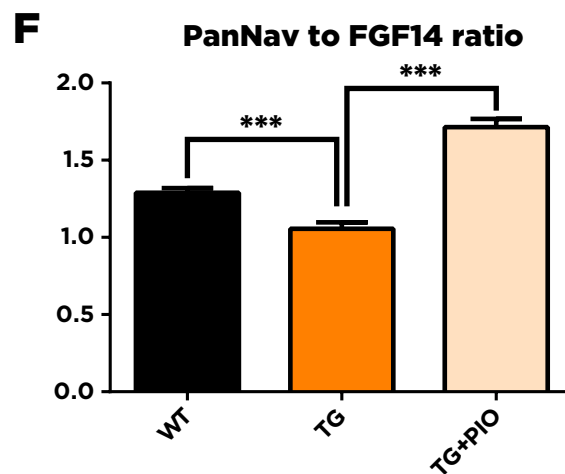**G**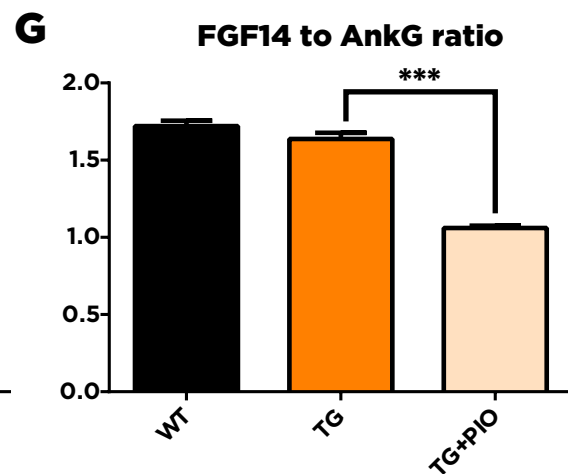

Supplement: NIHMS882340-supplement-Supplementary_Data.pdf [file NIHMS882340-supplement-Supplementary_Data.pdf]
